# Supplementary material for: Heritable alteration in salt-tolerance in rice induced by introgression from wild rice (Zizania latifolia)
Source: PubMed Central journal article supplement (PMC4883729; doi:10.1186/1939-8433-5-36), 2012-12-19

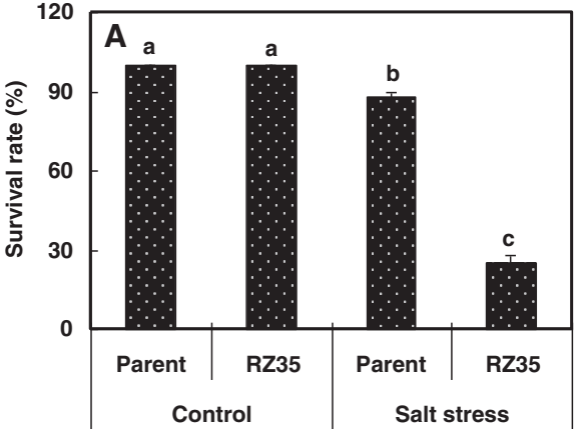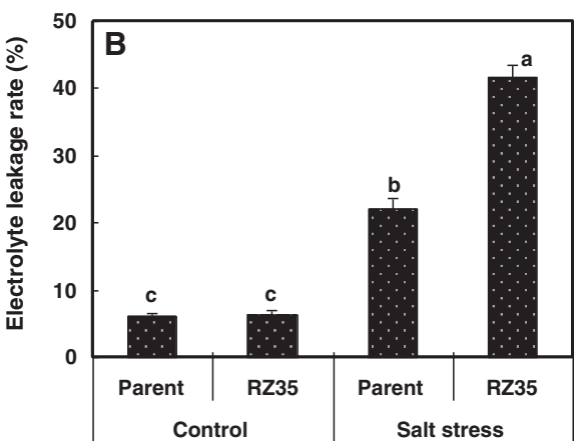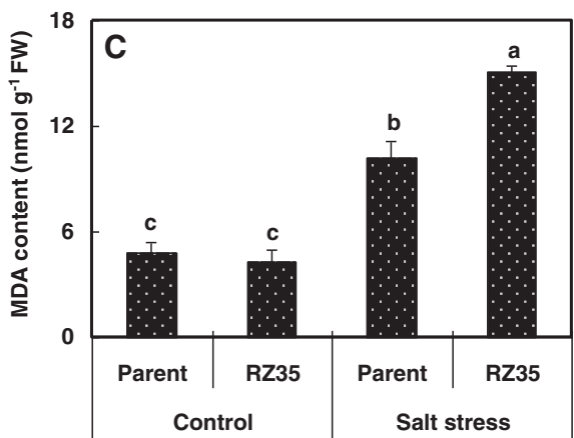

Supplement: 12284_2012_35_MOESM2_ESM.pdf [file 12284_2012_35_MOESM2_ESM.pdf]
